# Supplementary material for: Leaf carbon and nitrogen stoichiometric variation along environmental gradients
Source: Copernicus journal article supplement (doi:10.5194/bg-2023-87), 2023-06-12

## Supplemental Information: Leaf carbon and nitrogen stoichiometric variation along environmental gradients

Huiying Xu<sup>1</sup>, Han Wang<sup>1\*</sup>, I. Colin Prentice<sup>1,2,3</sup>, Sandy P. Harrison<sup>1,4</sup>

<sup>1</sup>Department of Earth System Science, Ministry of Education Key Laboratory for Earth System Modeling, Institute for Global Change Studies, Tsinghua University, Beijing 100084, China;

<sup>2</sup>Georgina Mace Centre for the Living Planet, Department of Life Sciences, Imperial College London, Silwood Park Campus, Buckhurst Road, Ascot, SL5 7PY, UK;

<sup>3</sup>Department of Biological Sciences, Macquarie University, North Ryde, NSW 2109, Australia;

<sup>4</sup>School of Archaeology, Geography and Environmental Sciences (SAGES), University of Reading, Reading, RG6 6AH, UK.

10 Correspondence to: Han Wang ([wang\\_han@tsinghua.edu.cn](mailto:wang_han@tsinghua.edu.cn))

**Table S1 Abbreviations of genera in Fig. 2.**

| Leaf habits | Abbreviation | Genus                  |
|-------------|--------------|------------------------|
| Deciduous   | Ac           | <i>Acer</i>            |
| Deciduous   | Al           | <i>Allium</i>          |
| Deciduous   | Ar           | <i>Artemisia</i>       |
| Deciduous   | Cg           | <i>Caragana</i>        |
| Deciduous   | Cx           | <i>Carex</i>           |
| Deciduous   | Ls           | <i>Lespedeza</i>       |
| Deciduous   | Ln           | <i>Lonicera</i>        |
| Deciduous   | Pt           | <i>Potentilla</i>      |
| Deciduous   | Qc           | <i>Quercus</i>         |
| Deciduous   | Rb           | <i>Rubus</i>           |
| Deciduous   | Sl           | <i>Salsola</i>         |
| Deciduous   | Th           | <i>Thalictrum</i>      |
| Evergreen   | Cm           | <i>Camellia</i>        |
| Evergreen   | Cs           | <i>Castanopsis</i>     |
| Evergreen   | Cy           | <i>Cyclobalanopsis</i> |
| Evergreen   | Fc           | <i>Ficus</i>           |
| Evergreen   | Il           | <i>Ilex</i>            |
| Evergreen   | Lt           | <i>Lithocarpus</i>     |
| Evergreen   | Pn           | <i>Pinus</i>           |
| Evergreen   | Rh           | <i>Rhododendron</i>    |
| Evergreen   | Sm           | <i>Smilax</i>          |
| Evergreen   | Sy           | <i>Symplocos</i>       |

**Table S2 Summary of the mixed model relating  $N_{mass}$  to  $V_{cmax25}/M_a$ , with LAI as a random effect on both the slope and the intercept.**

|  | slope | intercept |
|--|-------|-----------|
|--|-------|-----------|

| LAI effect |     | $p = 0.03$ | $p < 0.01$ |
|------------|-----|------------|------------|
| LAI group  | 0-1 | 0.32       | 2.05       |
|            | 1-2 | 0.48       | 1.85       |
|            | 2-3 | 0.63       | 1.86       |
|            | 3-4 | 0.65       | 1.79       |
|            | 4-5 | 0.71       | 1.56       |
|            | >5  | 0.74       | 1.45       |

15

**Fig. S1 The locations and biomes of sites in this study.** (a) Each red dot is a site from CPTDv2. (b) Whittaker plot, showing site climates as black dots.

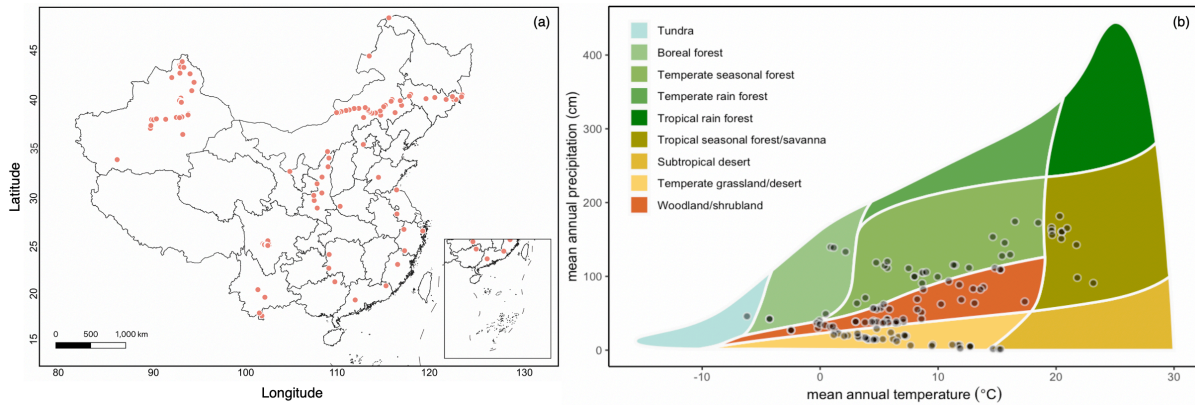

20

**Fig. S2 The relationships between leaf stoichiometric traits and soil C:N ratio.** Yellow and green dots are deciduous and evergreen species, respectively.

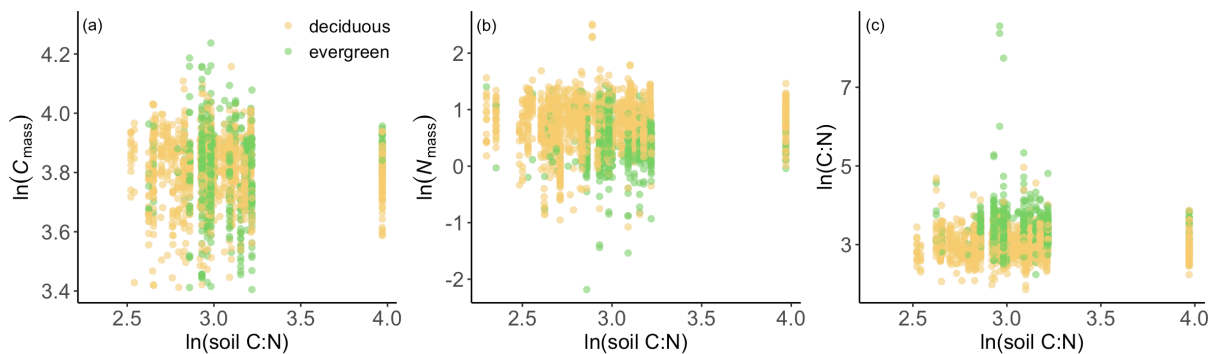

25

**Fig. S3 The relationship between leaf carbon ( $C_{mass}$ ), nitrogen concentration ( $N_{mass}$ ) and C:N ratio.** Grey lines are isolines of constant C:N ratio. The  $x$  and  $y$  axes are natural-log transformed. Yellow and green dots are deciduous and evergreen species respectively.

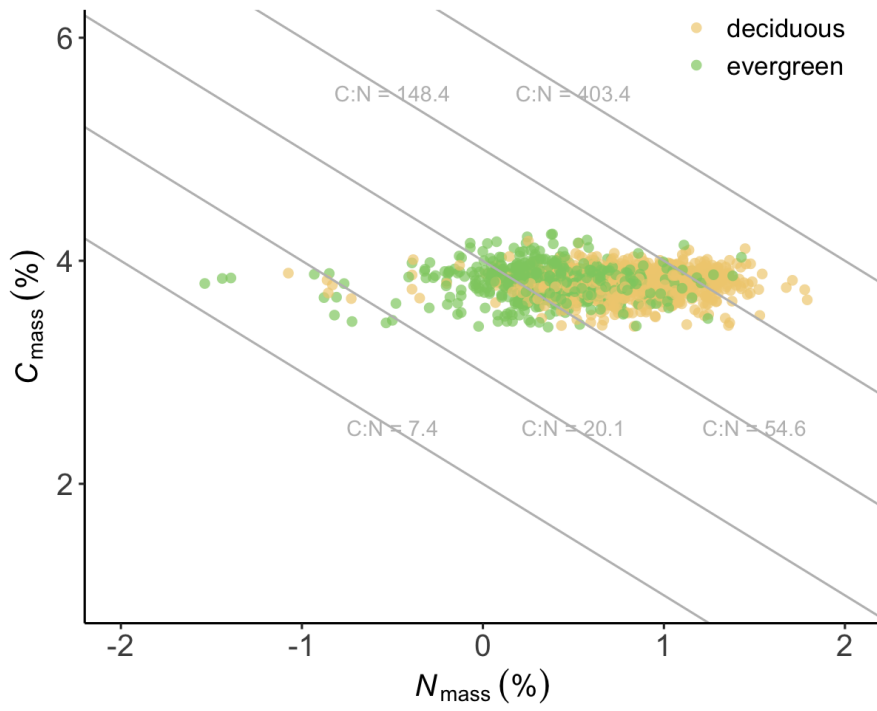

30 **Fig. S4 Histogram of standard deviations (SD) for the within- and between-site variation of each trait.** Dashed and solid lines represent between-site and mean within-site SD, respectively. Yellow and green colours distinguish deciduous and evergreen species.

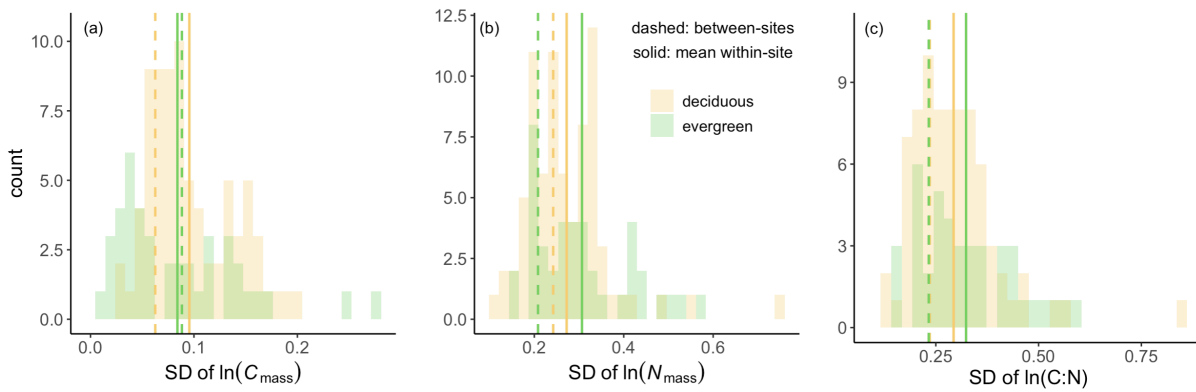

Supplement: Supplementary file 1 [file bg-2023-87-supplement.pdf]
